# Supplementary material for: WHO guidance on mental health training: a systematic review of the progress for non-specialist health workers
Source: PubMed Central journal article supplement — BMJ Open. 2019 Feb 1;9(1):e024059. doi: 10.1136/bmjopen-2018-024059 (PMC6361333; doi:10.1136/bmjopen-2018-024059), 2019-02-01
Supplement: bmjopen-2018-024059supp001.pdf [file bmjopen-2018-024059supp001.pdf]

## **Supplementary Material: World Health Organisation Guidance on Mental Health Training: A Systematic Review of the Progress for Non-specialist Health Workers**

A Caulfield\*<sup>12</sup> MBBChir, D Vatansever\*<sup>34</sup> PhD, G Lambert MBBChir<sup>1</sup>, T Van Bortel PhD<sup>56</sup>

*\* These authors contributed equally to this work.*

1. University of Cambridge, Department of Medicine, School of Clinical Medicine, Cambridge, UK
2. Karolinska Institutet, Department of Public Health Sciences, Stockholm, Sweden
3. University of Cambridge, Department of Psychiatry, Cambridge, UK
4. University of York, Department of Psychology, York, UK
5. University of Cambridge, Cambridge Institute of Public Health, Cambridge, UK
6. Institute for Health and Human Development, University of East London, UK

### **Correspondence to:**

Dr Tine Van Bortel  
Cambridge Institute of Public Health,  
Box 113 Cambridge Biomedical Campus,  
Forvie Site,  
Robinson Way,  
Cambridge  
CB2 0SR  
United Kingdom

Email: [tv250@medschl.cam.ac.uk](mailto:tv250@medschl.cam.ac.uk)

## Supplementary Methods

We provide the full search strategy for the PubMed database including user query, the database specific translation, the final query translation and the associated PubMed MeSH terms.

### PubMed Query

(((((mental health) OR mental illness) OR mental disorder)) AND (((((((train) OR training) OR educate) OR education) OR educating) OR program) OR programme) OR toolkit) OR tool kit)) AND (((((((primary care) OR primary healthcare) OR primary health care) OR community care) OR community healthcare) OR community health care) OR integration) OR integrated care) OR integrated healthcare) OR integrated health care)) AND (((((((evaluate) OR evaluation) OR evaluating) OR outcome) OR detect) OR detection) OR detecting) OR diagnose) OR diagnosis) OR diagnosing) OR measure) OR measurement) OR measuring) OR attitude) OR stigma)

**Table S1. PubMed Translation**

|                       |                                                                                                                                                                                                                                                                                         |
|-----------------------|-----------------------------------------------------------------------------------------------------------------------------------------------------------------------------------------------------------------------------------------------------------------------------------------|
| mental health         | "mental health"[MeSH Terms] OR ("mental"[All Fields] AND "health"[All Fields]) OR "mental health"[All Fields]                                                                                                                                                                           |
| mental illness        | "mental disorders"[MeSH Terms] OR ("mental"[All Fields] AND "disorders"[All Fields]) OR "mental disorders"[All Fields] OR ("mental"[All Fields] AND "illness"[All Fields]) OR "mental illness"[All Fields]                                                                              |
| mental disorder       | "mental disorders"[MeSH Terms] OR ("mental"[All Fields] AND "disorders"[All Fields]) OR "mental disorders"[All Fields] OR ("mental"[All Fields] AND "disorder"[All Fields]) OR "mental disorder"[All Fields]                                                                            |
| training              | "education"[Subheading] OR "education"[All Fields] OR "training"[All Fields] OR "education"[MeSH Terms] OR "training"[All Fields]                                                                                                                                                       |
| educate               | "teaching"[MeSH Terms] OR "teaching"[All Fields] OR "educate"[All Fields]                                                                                                                                                                                                               |
| education             | "education"[Subheading] OR "education"[All Fields] OR "educational status"[MeSH Terms] OR ("educational"[All Fields] AND "status"[All Fields]) OR "educational status"[All Fields] OR "education"[All Fields] OR "education"[MeSH Terms]                                                |
| educating             | "teaching"[MeSH Terms] OR "teaching"[All Fields] OR "educating"[All Fields]                                                                                                                                                                                                             |
| primary care          | "primary health care"[MeSH Terms] OR ("primary"[All Fields] AND "health"[All Fields] AND "care"[All Fields]) OR "primary health care"[All Fields] OR ("primary"[All Fields] AND "care"[All Fields]) OR "primary care"[All Fields]                                                       |
| primary healthcare    | "primary health care"[MeSH Terms] OR ("primary"[All Fields] AND "health"[All Fields] AND "care"[All Fields]) OR "primary health care"[All Fields] OR ("primary"[All Fields] AND "healthcare"[All Fields]) OR "primary healthcare"[All Fields]                                           |
| primary health care   | "primary health care"[MeSH Terms] OR ("primary"[All Fields] AND "health"[All Fields] AND "care"[All Fields]) OR "primary health care"[All Fields]                                                                                                                                       |
| community             | "residence characteristics"[MeSH Terms] OR ("residence"[All Fields] AND "characteristics"[All Fields]) OR "residence characteristics"[All Fields] OR "community"[All Fields]                                                                                                            |
| community healthcare  | "community health services"[MeSH Terms] OR ("community"[All Fields] AND "health"[All Fields] AND "services"[All Fields]) OR "community health services"[All Fields] OR ("community"[All Fields] AND "healthcare"[All Fields]) OR "community healthcare"[All Fields]                     |
| community health care | "community health services"[MeSH Terms] OR ("community"[All Fields] AND "health"[All Fields] AND "services"[All Fields]) OR "community health services"[All Fields] OR ("community"[All Fields] AND "health"[All Fields] AND "care"[All Fields]) OR "community health care"[All Fields] |
| integration           | "Integration"[Journal] OR "Integration (Amst)"[Journal] OR "integration"[All Fields]                                                                                                                                                                                                    |
| integrated care       | "Int J Integr Care"[Journal] OR ("integrated"[All Fields] AND "care"[All Fields]) OR                                                                                                                                                                                                    |

|             |                                                                                                                                                                                                                                          |
|-------------|------------------------------------------------------------------------------------------------------------------------------------------------------------------------------------------------------------------------------------------|
|             | "integrated care"[All Fields]                                                                                                                                                                                                            |
| healthcare  | "delivery of health care"[MeSH Terms] OR ("delivery"[All Fields] AND "health"[All Fields] AND "care"[All Fields]) OR "delivery of health care"[All Fields] OR "healthcare"[All Fields]                                                   |
| health care | "delivery of health care"[MeSH Terms] OR ("delivery"[All Fields] AND "health"[All Fields] AND "care"[All Fields]) OR "delivery of health care"[All Fields] OR ("health"[All Fields] AND "care"[All Fields]) OR "health care"[All Fields] |
| evaluation  | "Evaluation"[Journal] OR "Evaluation (Lond)"[Journal] OR "evaluation"[All Fields]                                                                                                                                                        |
| diagnose    | "diagnosis"[MeSH Terms] OR "diagnosis"[All Fields] OR "diagnose"[All Fields]                                                                                                                                                             |
| diagnosis   | "diagnosis"[Subheading] OR "diagnosis"[All Fields] OR "diagnosis"[MeSH Terms]                                                                                                                                                            |
| diagnosing  | "diagnosis"[MeSH Terms] OR "diagnosis"[All Fields] OR "diagnosing"[All Fields]                                                                                                                                                           |
| measure     | "weights and measures"[MeSH Terms] OR ("weights"[All Fields] AND "measures"[All Fields]) OR "weights and measures"[All Fields] OR "measure"[All Fields]                                                                                  |
| measurement | "Measurement (Lond)"[Journal] OR "Measurement ( Mahwah N J)"[Journal] OR "measurement"[All Fields]                                                                                                                                       |
| attitude    | "attitude"[MeSH Terms] OR "attitude"[All Fields]                                                                                                                                                                                         |
| stigma      | "social stigma"[MeSH Terms] OR ("social"[All Fields] AND "stigma"[All Fields]) OR "social stigma"[All Fields] OR "stigma"[All Fields]                                                                                                    |

### PubMed Query Translation

(((("mental health"[MeSH Terms] OR ("mental"[All Fields] AND "health"[All Fields]) OR "mental health"[All Fields]) OR ("mental disorders"[MeSH Terms] OR ("mental"[All Fields] AND "disorders"[All Fields]) OR "mental disorders"[All Fields] OR ("mental"[All Fields] AND "illness"[All Fields]) OR "mental illness"[All Fields])) OR ("mental disorders"[MeSH Terms] OR ("mental"[All Fields] AND "disorders"[All Fields]) OR "mental disorders"[All Fields] OR ("mental"[All Fields] AND "disorder"[All Fields]) OR "mental disorder"[All Fields])) AND (((((((train[All Fields] OR ("education"[Subheading] OR "education"[All Fields] OR "training"[All Fields] OR "education"[MeSH Terms] OR "training"[All Fields])) OR ("teaching"[MeSH Terms] OR "teaching"[All Fields] OR "educate"[All Fields])) OR ("education"[Subheading] OR "education"[All Fields] OR "educational status"[MeSH Terms] OR ("educational"[All Fields] AND "status"[All Fields]) OR "educational status"[All Fields] OR "education"[All Fields] OR "education"[MeSH Terms])) OR ("teaching"[MeSH Terms] OR "teaching"[All Fields] OR "educating"[All Fields])) OR program[All Fields] OR programme[All Fields] OR toolkit[All Fields] OR (tool[All Fields] AND kit[All Fields]))) AND (((((((("primary health care"[MeSH Terms] OR ("primary"[All Fields] AND "health"[All Fields] AND "care"[All Fields]) OR "primary health care"[All Fields] OR ("primary"[All Fields] AND "care"[All Fields]) OR "primary care"[All Fields] OR ("primary health care"[MeSH Terms] OR ("primary"[All Fields] AND "health"[All Fields] AND "care"[All Fields]) OR "primary health care"[All Fields] OR ("primary"[All Fields] AND "healthcare"[All Fields]) OR "primary healthcare"[All Fields])) OR ("primary health care"[MeSH Terms] OR ("primary"[All Fields] AND "health"[All Fields] AND "care"[All Fields]) OR "primary health care"[All Fields]) OR ("residence characteristics"[MeSH Terms] OR ("residence"[All Fields] AND "characteristics"[All Fields]) OR "residence characteristics"[All Fields] OR "community"[All Fields] AND care[All Fields])) OR ("community health services"[MeSH Terms] OR ("community"[All Fields] AND "health"[All Fields] AND "services"[All Fields]) OR "community health services"[All Fields] OR ("community"[All Fields] AND "healthcare"[All Fields]) OR "community healthcare"[All Fields])) OR ("community health services"[MeSH Terms] OR ("community"[All Fields] AND "health"[All Fields] AND "services"[All Fields]) OR "community health services"[All Fields] OR ("community"[All Fields] AND "health"[All Fields] AND "care"[All Fields]) OR "community health care"[All Fields])) OR ("Integration"[Journal] OR "Integration (Amst)"[Journal] OR "integration"[All Fields]) OR ("Int J Integr Care"[Journal] OR ("integrated"[All Fields] AND "care"[All Fields]) OR "integrated care"[All Fields]) OR (integrated[All Fields] AND ("delivery of health care"[MeSH Terms] OR ("delivery"[All Fields] AND "health"[All Fields] AND "care"[All Fields]) OR "delivery of health care"[All Fields] OR "healthcare"[All Fields])) OR (integrated[All Fields] AND ("delivery of health care"[MeSH Terms] OR ("delivery"[All Fields] AND "health"[All Fields] AND "care"[All Fields]) OR "delivery of health care"[All Fields] OR ("health"[All Fields] AND "care"[All Fields]) OR "health care"[All Fields])))) AND (((((((evaluate[All Fields] OR ("Evaluation"[Journal] OR "Evaluation (Lond)"[Journal] OR "evaluation"[All Fields]) OR evaluating[All Fields]) OR outcome[All Fields]) OR detect[All Fields]) OR

detection[All Fields]) OR detecting[All Fields]) OR ("diagnosis"[MeSH Terms] OR "diagnosis"[All Fields] OR "diagnose"[All Fields])) OR ("diagnosis"[Subheading] OR "diagnosis"[All Fields] OR "diagnosis"[MeSH Terms])) OR ("diagnosis"[MeSH Terms] OR "diagnosis"[All Fields] OR "diagnosing"[All Fields])) OR ("weights and measures"[MeSH Terms] OR ("weights"[All Fields] AND "measures"[All Fields]) OR "weights and measures"[All Fields] OR "measure"[All Fields])) OR ("Measurement (Lond)"[Journal] OR "Measurement (Mahwah N J)"[Journal] OR "measurement"[All Fields])) OR measuring[All Fields]) OR ("attitude"[MeSH Terms] OR "attitude"[All Fields])) OR ("social stigma"[MeSH Terms] OR ("social"[All Fields] AND "stigma"[All Fields]) OR "social stigma"[All Fields] OR "stigma"[All Fields]))

**Table S2. PubMed MeSH Terms**

| Entry Term       | MeSH Terms                                                                                                                                                                                                                                                                                                                                                                                                                                                                      |
|------------------|---------------------------------------------------------------------------------------------------------------------------------------------------------------------------------------------------------------------------------------------------------------------------------------------------------------------------------------------------------------------------------------------------------------------------------------------------------------------------------|
| mental health    | <ul style="list-style-type: none"> <li>• Health, Mental</li> <li>• Mental Hygiene</li> <li>• Hygiene, Mental</li> </ul>                                                                                                                                                                                                                                                                                                                                                         |
| mental disorders | <ul style="list-style-type: none"> <li>• Disorder, Mental</li> <li>• Disorders, Mental</li> <li>• Mental Disorder</li> <li>• Diagnosis, Psychiatric</li> <li>• Psychiatric Diagnosis</li> <li>• Behavior Disorders</li> <li>• Disorders, Behavior</li> <li>• Mental Disorders, Severe</li> <li>• Disorder, Severe Mental</li> <li>• Disorders, Severe Mental</li> <li>• Mental Disorder, Severe</li> <li>• Severe Mental Disorder</li> <li>• Severe Mental Disorders</li> </ul> |
| education        | <ul style="list-style-type: none"> <li>• Workshops</li> <li>• Workshop</li> <li>• Training Programs</li> <li>• Program, Training</li> <li>• Programs, Training</li> <li>• Training Program</li> <li>• Educational Activities</li> <li>• Activities, Educational</li> <li>• Activity, Educational</li> <li>• Educational Activity</li> <li>• Literacy Programs</li> <li>• Literacy Program</li> <li>• Program, Literacy</li> <li>• Programs, Literacy</li> </ul>                 |
| teaching         | <ul style="list-style-type: none"> <li>• Training Techniques</li> <li>• Technique, Training</li> <li>• Techniques, Training</li> <li>• Training Technique</li> <li>• Training Technics</li> <li>• Technic, Training</li> <li>• Technics, Training</li> <li>• Training Technic</li> </ul>                                                                                                                                                                                        |

|                     |                                                                                                                                                                                                                                                                                                                                                                                                                                                                                                                                                                                                                                   |
|---------------------|-----------------------------------------------------------------------------------------------------------------------------------------------------------------------------------------------------------------------------------------------------------------------------------------------------------------------------------------------------------------------------------------------------------------------------------------------------------------------------------------------------------------------------------------------------------------------------------------------------------------------------------|
|                     | <ul style="list-style-type: none"> <li>• Pedagogy</li> <li>• Pedagogies</li> <li>• Teaching Methods</li> <li>• Method, Teaching</li> <li>• Methods, Teaching</li> <li>• Teaching Method</li> <li>• Academic Training</li> <li>• Training, Academic</li> <li>• Training Activities</li> <li>• Activities, Training</li> <li>• Training Activity</li> <li>• Techniques, Educational</li> <li>• Technics, Educational</li> <li>• Educational Technics</li> <li>• Educational Technic</li> <li>• Technic, Educational</li> <li>• Educational Techniques</li> <li>• Educational Technique</li> <li>• Technique, Educational</li> </ul> |
| educational status  | <ul style="list-style-type: none"> <li>• Educational Achievement</li> <li>• Status, Educational</li> <li>• Achievement, Educational</li> <li>• Achievements, Educational</li> <li>• Educational Achievements</li> <li>• Educational Status, Maternal</li> <li>• Status, Maternal Educational</li> <li>• Maternal Educational Status</li> <li>• Educational Status, Paternal</li> <li>• Status, Paternal Educational</li> <li>• Paternal Educational Status</li> </ul>                                                                                                                                                             |
| primary health care | <ul style="list-style-type: none"> <li>• Care, Primary Health</li> <li>• Health Care, Primary</li> <li>• Primary Healthcare</li> <li>• Healthcare, Primary</li> <li>• Primary Care</li> <li>• Care, Primary</li> </ul>                                                                                                                                                                                                                                                                                                                                                                                                            |
| community           | <ul style="list-style-type: none"> <li>• Characteristic, Residence</li> <li>• Characteristics, Residence</li> <li>• Residence Characteristic</li> <li>• Domicile</li> <li>• Domiciles</li> <li>• Residential Selection</li> <li>• Residential Selections</li> <li>• Selection, Residential</li> <li>• Selections, Residential</li> <li>• Neighborhood</li> <li>• Neighborhoods</li> <li>• Place of Birth</li> <li>• Birth Place</li> <li>• Community</li> <li>• Communities</li> </ul>                                                                                                                                            |

|                           |                                                                                                                                                                                                                                                                                                                                                                                                                                                                                                                                                                                                                                                                                                                                                                                                                                                                                                                                                                                                                                                                                                                                                                                                                                                                                                                                               |
|---------------------------|-----------------------------------------------------------------------------------------------------------------------------------------------------------------------------------------------------------------------------------------------------------------------------------------------------------------------------------------------------------------------------------------------------------------------------------------------------------------------------------------------------------------------------------------------------------------------------------------------------------------------------------------------------------------------------------------------------------------------------------------------------------------------------------------------------------------------------------------------------------------------------------------------------------------------------------------------------------------------------------------------------------------------------------------------------------------------------------------------------------------------------------------------------------------------------------------------------------------------------------------------------------------------------------------------------------------------------------------------|
|                           | <ul style="list-style-type: none"> <li>• Living Arrangements</li> <li>• Arrangement, Living</li> <li>• Arrangements, Living</li> <li>• Living Arrangement</li> </ul>                                                                                                                                                                                                                                                                                                                                                                                                                                                                                                                                                                                                                                                                                                                                                                                                                                                                                                                                                                                                                                                                                                                                                                          |
| community health services | <ul style="list-style-type: none"> <li>• Health Services, Community</li> <li>• Community Health Service</li> <li>• Health Service, Community</li> <li>• Service, Community Health</li> <li>• Services, Community Health</li> <li>• Community Health Care</li> <li>• Care, Community Health</li> <li>• Health Care, Community</li> <li>• Community Healthcare</li> <li>• Community Healthcares</li> <li>• Healthcare, Community</li> <li>• Healthcares, Community</li> </ul>                                                                                                                                                                                                                                                                                                                                                                                                                                                                                                                                                                                                                                                                                                                                                                                                                                                                   |
| delivery of health care   | <ul style="list-style-type: none"> <li>• Healthcare Delivery</li> <li>• Deliveries, Healthcare</li> <li>• Delivery, Healthcare</li> <li>• Delivery of Healthcare</li> <li>• Healthcare Deliveries</li> <li>• Health Care Delivery</li> <li>• Delivery, Health Care</li> <li>• Contraceptive Distribution</li> <li>• Contraceptive Distributions</li> <li>• Distribution, Contraceptive</li> <li>• Distributions, Contraceptive</li> <li>• Delivery of Dental Care</li> <li>• Dental Care Delivery</li> <li>• Delivery, Dental Care</li> <li>• Health Care</li> <li>• Care, Health</li> <li>• Healthcare</li> <li>• Health Care Systems</li> <li>• Health Care System</li> <li>• System, Health Care</li> <li>• Systems, Health Care</li> <li>• Healthcare Systems</li> <li>• Healthcare System</li> <li>• System, Healthcare</li> <li>• Systems, Healthcare</li> <li>• Nonclinical Distribution</li> <li>• Distributions, Nonclinical</li> <li>• Nonclinical Distributions</li> <li>• Distribution, Nonclinical</li> <li>• Distribution, Non-Clinical</li> <li>• Distribution, Non Clinical</li> <li>• Distributions, Non-Clinical</li> <li>• Non-Clinical Distributions</li> <li>• Non-Clinical Distribution</li> <li>• Non Clinical Distribution</li> <li>• Community-Based Distribution</li> <li>• Community Based Distribution</li> </ul> |

|                      |                                                                                                                                                                                                                                                                                                                                                                                                               |
|----------------------|---------------------------------------------------------------------------------------------------------------------------------------------------------------------------------------------------------------------------------------------------------------------------------------------------------------------------------------------------------------------------------------------------------------|
|                      | <ul style="list-style-type: none"> <li>• Community-Based Distributions</li> <li>• Distribution, Community-Based</li> <li>• Distributions, Community-Based</li> <li>• Distributional Activities</li> <li>• Activities, Distributional</li> <li>• Activity, Distributional</li> <li>• Distributional Activity</li> </ul>                                                                                        |
| diagnosis            | <ul style="list-style-type: none"> <li>• Diagnoses</li> <li>• Diagnoses and Examinations</li> <li>• Examinations and Diagnoses</li> <li>• Postmortem Diagnosis</li> <li>• Diagnoses, Postmortem</li> <li>• Diagnosis, Postmortem</li> <li>• Postmortem Diagnoses</li> <li>• Antemortem Diagnosis</li> <li>• Antemortem Diagnoses</li> <li>• Diagnoses, Antemortem</li> <li>• Diagnosis, Antemortem</li> </ul> |
| weights and measures | <ul style="list-style-type: none"> <li>• Measures and Weights</li> <li>• Weights</li> <li>• Measures</li> <li>• Measure</li> <li>• Scales</li> </ul>                                                                                                                                                                                                                                                          |
| attitude             | <ul style="list-style-type: none"> <li>• Attitudes</li> <li>• Opinions</li> <li>• Opinion</li> </ul>                                                                                                                                                                                                                                                                                                          |
| social stigma        | <ul style="list-style-type: none"> <li>• Social Stigmas</li> <li>• Stigmas, Social</li> <li>• Stigma, Social</li> </ul>                                                                                                                                                                                                                                                                                       |
